# Supplementary material
Source: PubMed Central journal article supplement (PMC7692018)
Supplement: Addendum_1.pdf [file Addendum_1.pdf]

### **Addendum 1. Group Session Schedule of Topics**

| <b>Session</b> | <b>Topic</b>                                                                                             |
|----------------|----------------------------------------------------------------------------------------------------------|
| 1              | Introduction to Lifestyle Change                                                                         |
| 2              | Eating for Health & Weight Loss                                                                          |
| 3              | Eating Routines                                                                                          |
| 4              | Prevention/Management of Chronic Medical Conditions,<br>Plus guest lecture (Thyroid & Weight Management) |
| 5              | Barriers to Change & Coping Strategies                                                                   |
| 6              | Eating Out and Social Eating                                                                             |
| 7              | Field Trip - Meet at Restaurant                                                                          |
| 8              | Physical Activity & Exercise                                                                             |
| 9              | Stress Management, plus guest lecture (Meditation)                                                       |
| 10             | The Importance of Sleep                                                                                  |
| 11             | Life Balance & Time Management                                                                           |
| 12             | Wrap-up & Review: Planning for Sustained Change                                                          |
